# Supplementary material
Source: Springer Nature journal article supplement (https://www.springermedizin.de/resource/supplementary/12943_2013_1484_MOESM13_ESM.pdf/9553124)

A

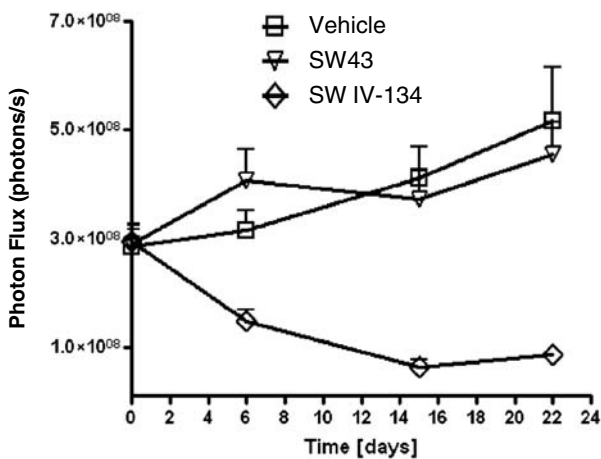

B

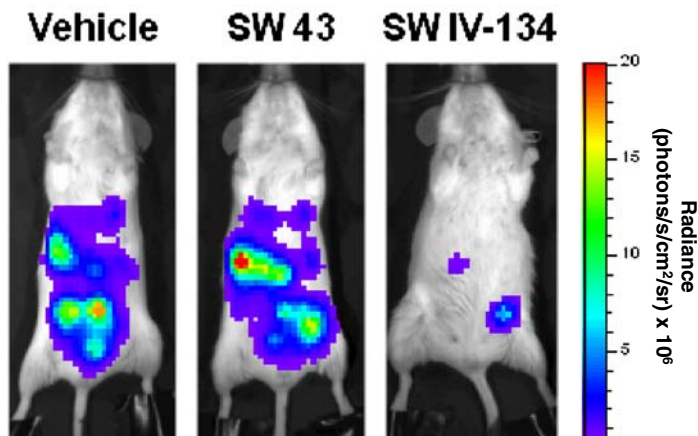

C

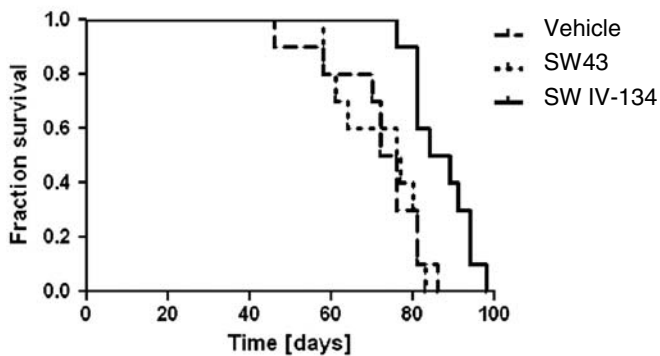

Supplement: MOESM13 [file 9553124]
